# Supplementary material for: Role of lycopene from tomato on cardiovascular risk: an umbrella review of systematic reviews and meta-analyses of intervention studies
Source: Royal Society of Chemistry journal article supplement (doi:10.1039/d5fo04213e), 2025-12-04
Supplement: d5fo04213e1.pdf [file d5fo04213e1.pdf]

## **Supplementary information list**

Supplementary Table 1. Search strategy

Supplementary Table 2. Characteristics of the participants in the primary studies included in the systematic reviews and meta-analyses

Supplementary Fig. 1. Results of AMSTAR2 quality assessment of the methodological quality of the meta-analysis

Supplementary Fig. 2. Leave-one-out sensitivity analysis for the meta-analysis of HDL-C.

**Supplementary Table 1.** Search strategy

| Search terms | PubMed <sup>1)</sup>          | Scopus <sup>2)</sup>          | ScienceON <sup>3)</sup>       |
|--------------|-------------------------------|-------------------------------|-------------------------------|
| 1            | tomato*                       | tomato*                       | tomato*                       |
| 2            | lycopene                      | lycopene                      | lycopene                      |
| 3            | <i>"Solanum lycopersicum"</i> | <i>"Solanum lycopersicum"</i> | <i>"Solanum lycopersicum"</i> |
| 3            | 1 OR 2 OR 3                   | 1 OR 2 OR 3                   | 1   2   3                     |
| 4            | systematic review*            | systematic review*            | systematic review*            |
| 5            | meta-analy*                   | meta-analy*                   | meta-analy*                   |
| 6            | metaanaly*                    | metaanaly*                    | metaanaly*                    |
| 7            | meta analy*                   | meta analy*                   | meta analy*                   |
| 8            | 4 OR 5 OR 6 OR 7              | 4 OR 5 OR 6 OR 7              | 4   5   6   7                 |
| 9            | 3 AND 8                       | 3 AND 8                       | 3 AND 8                       |

1) ("Tomato"[Title/Abstract] OR "Lycopene"[Title/Abstract] OR "Solanum lycopersicum"[Title/Abstract]) AND ("systematic review\*"[Title/Abstract] OR "meta analy\*"[Title/Abstract] OR "metaanaly\*"[Title/Abstract] OR "meta analy\*"[Title/Abstract])

2) ( TITLE-ABS-KEY ( tomato\* OR lycopene OR "Solanum lycopersicum" ) AND TITLE-ABS-KEY ( systematic AND review\* OR meta-analy\* OR metaanaly\* OR meta AND analy\* ) ) AND ( LIMIT-TO ( LANGUAGE , "English" ) ) AND ( LIMIT-TO ( DOCTYPE , "re" ) )

3) Title=(tomato\* | lycopene | "Solanum lycopersicum") (systematic review\* | meta-analy\* | metaanaly\* | meta analy\*) OR Abstract=(tomato\* | lycopene | "Solanum lycopersicum") (systematic review\* | meta-analy\* | metaanaly\* | meta analy\*) OR Keyword=(tomato\* | lycopene | "Solanum lycopersicum") (systematic review\* | meta-analy\* | metaanaly\* | meta analy\*)

**Supplementary Table 2.** Characteristics of the participants in the primary studies included in the systematic reviews and meta-analyses

| Authors<br>(Year)                        | Population<br>(age range, n) | Participant characteristics                                                                                                                                                                                                                                                                                                                                                                                                                      |
|------------------------------------------|------------------------------|--------------------------------------------------------------------------------------------------------------------------------------------------------------------------------------------------------------------------------------------------------------------------------------------------------------------------------------------------------------------------------------------------------------------------------------------------|
| Inoue <i>et al.</i><br>(2021)            | ≥18<br>(1,635)               | <ul style="list-style-type: none"> <li>● Healthy adults / Female students</li> <li>● CVD / Hyperlipidemia / Low HDL-cholesterol / Metabolic syndrome / Overweight / T2D</li> </ul>                                                                                                                                                                                                                                                               |
| Joung <i>et al.</i><br>(2023)            | 18–74<br>(385)               | <ul style="list-style-type: none"> <li>● CVD / Dyslipidemia / Heart failure / Hypertension &amp; Pre-hypertension / Metabolic syndrome / Obesity / T2D</li> </ul>                                                                                                                                                                                                                                                                                |
| Rattanaivanon <i>et al.</i><br>(2021)    | ≥18<br>(548)                 | <ul style="list-style-type: none"> <li>● Healthy adults</li> <li>● Hypertension &amp; Pre-hypertension / Overweight</li> </ul>                                                                                                                                                                                                                                                                                                                   |
| Rezaei kelishadi <i>et al.</i><br>(2022) | ≥18<br>(688)                 | <ul style="list-style-type: none"> <li>● Healthy adults</li> <li>● CVD / Hypertension &amp; Pre-hypertension / Overweight</li> </ul>                                                                                                                                                                                                                                                                                                             |
| Senkus <i>et al.</i><br>(2019)           | 20–80<br>(29,957)            | <ul style="list-style-type: none"> <li>● Healthy adults / Female students</li> <li>● Metabolic syndrome (pre-existing diagnosis) / Overweight CVD</li> </ul>                                                                                                                                                                                                                                                                                     |
| Tierney <i>et al.</i><br>(2020)          | ≥18<br>(2,306)               | <ul style="list-style-type: none"> <li>● Healthy adults / Physically active (e.g., ultramarathon runners) / Postmenopausal women / Sedentary lifestyle / Smokers or alcohol consumers</li> <li>● CVD (incl. stable on statin therapy) / Dyslipidemia / Elevated cholesterol / Elevated triglycerides / Hypertension &amp; Pre-hypertension / Low HDL-cholesterol / Metabolic syndrome / Obesity / Overweight / Oxidative stress / T2D</li> </ul> |
| Wan <i>et al.</i><br>(2024)              | 18–75<br>(666)               | <ul style="list-style-type: none"> <li>● Healthy adults</li> <li>● Hypertension</li> </ul>                                                                                                                                                                                                                                                                                                                                                       |
| Wang <i>et al.</i><br>(2020)             | 18–74<br>(758)               | <ul style="list-style-type: none"> <li>● Healthy adults / Postmenopausal women</li> <li>● High cardiovascular-risk patients / Hypertension / Obesity / Overweight</li> </ul>                                                                                                                                                                                                                                                                     |
| Zamani <i>et al.</i><br>(2023)           | ≥18<br>(1,980)               | <ul style="list-style-type: none"> <li>● Healthy adults / Athletes / Female students / Postmenopausal women / Smokers (healthy)</li> <li>● Benign prostate hyperplasia / CVD / Chronic obstructive pulmonary disease / Heart failure / Hemodialysis / Hypertension &amp; Pre-hypertension / Obesity / T2D</li> </ul>                                                                                                                             |

Abbreviations: CVD, cardiovascular disease; T2D, type 2 diabetes; HDL, high-density lipoprotein.

| Authors (y)                   | 1 | 2 | 3 | 4 | 5 | 6 | 7 | 8 | 9 | 10 | 11 | 12 | 13 | 14 | 15 | 16 | Overall score |
|-------------------------------|---|---|---|---|---|---|---|---|---|----|----|----|----|----|----|----|---------------|
| Inoue et al. (2021)           | ● | ● | ● | ● | ● | ● | ● | ● | ● | ●  | ●  | ×  | ●  | ●  | ●  | ●  | High          |
| Joung et al.(2023)            | ● | ● | ● | ● | ● | ● | ● | ● | ● | ×  | -  | -  | ×  | ×  | -  | ×  | Low           |
| Rattanaivanon et al.(2021)    | ● | ● | ● | ● | ● | × | ● | ● | ● | ×  | ●  | ●  | ●  | ×  | ●  | ●  | Moderate      |
| Rezaei kelishadi et al.(2022) | ● | ● | ● | ● | ● | × | ● | ● | ● | ×  | ●  | ●  | ●  | ●  | ●  | ●  | Moderate      |
| Senkus et al.(2019)           | ● | ● | ● | ● | × | × | ● | ● | ● | ×  | -  | -  | ×  | ×  | -  | ●  | Low           |
| Tierney et al.(2020)          | ● | ● | ● | ● | ● | ● | ● | ● | ● | ×  | ●  | ●  | ●  | ●  | ×  | ●  | Low           |
| Wan et al.(2024)              | ● | ● | ● | ● | ● | × | ● | ● | ● | ×  | ●  | ×  | ●  | ●  | ●  | ●  | Moderate      |
| Wang et al.(2020)             | ● | ● | ● | ● | ● | ● | ● | ● | ● | ×  | ●  | ×  | ×  | ●  | ●  | ●  | Low           |
| Zamani et al.(2023)           | ● | ● | ● | ● | × | ● | ● | ● | ● | ×  | ●  | ×  | ●  | ●  | ●  | ●  | Moderate      |

**Supplementary Fig. 1. Results of AMSTAR2 quality assessment of the methodological quality of the systematic reviews.** Each row represents one included SR/MA, and columns represent the 16 AMSTAR 2 items. Green circles (●) indicate "Yes," yellow circles (●) indicate "Partial yes," red (X) marks indicate "No," and dashes (-) indicate "No meta-analysis conducted" (for items applicable only to meta-analyses). AMSTAR 2 Critical Items (bolded item numbers in the figure): 2, 4, 7, 9, 11, 13, 15. Full item descriptions: (1) PICO components in research question; (2) Protocol registration and justification for deviations; (3) Study design selection and justification; (4) Comprehensive literature search strategy; (5) Study selection in duplicate; (6) Data extraction in duplicate; (7) List of excluded studies with justification; (8) Adequate description of included studies; (9) Satisfactory technique for assessing risk of bias (RoB); (10) Reporting of funding sources for included studies; (11) Appropriate statistical methods for meta-analysis (if applicable); (12) Assessment of potential impact of RoB on results (if applicable); (13) Consideration of RoB when interpreting results; (14) Satisfactory explanation of heterogeneity; (15) Investigation of publication bias (if applicable); (16) Reporting of conflicts of interest and funding sources.

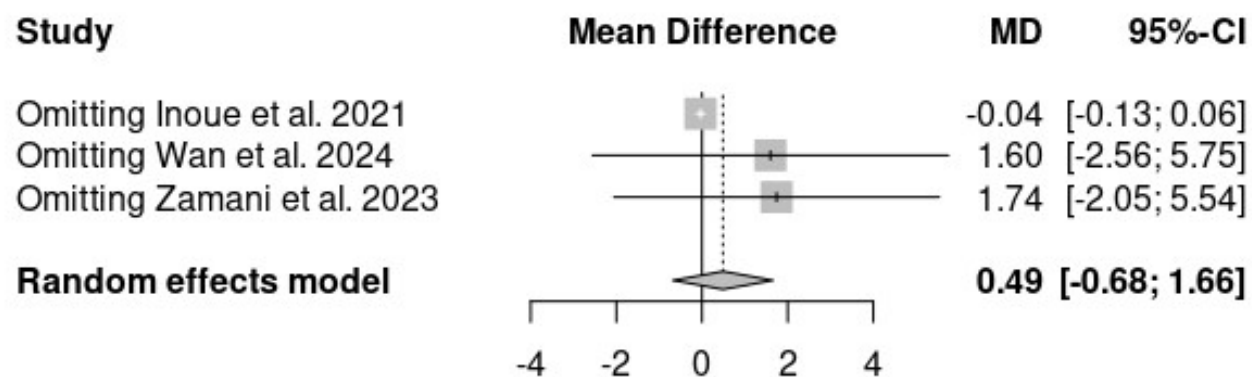

**Supplementary Fig. 2. Leave-one-out sensitivity analysis for the meta-analysis of HDL-C.** Forest plot showing the pooled mean difference (MD) in HDL-C when each systematic review was sequentially omitted from the meta-analysis. Each row represents the meta-analysis result on excluding the study indicated on the left. HDL-C, high-density lipoprotein cholesterol; MD, mean difference; CI, confidence interval.
